# Supplementary material for: Glial and Neuronal Alzheimer's Disease-Related Alterations Reproduced in Human Induced Pluripotent Stem Cells With Presenilin-1 Mutation
Source: Research Square preprint supplement (doi:10.21203/rs.3.rs-8549806/v1), 2026-01-19
Supplement: Supplementary file 1 [file c3c86e59ebd79bf6a4503d0c.docx]

**JNeuroinflammation – Comolli, Murari et al., 2026**


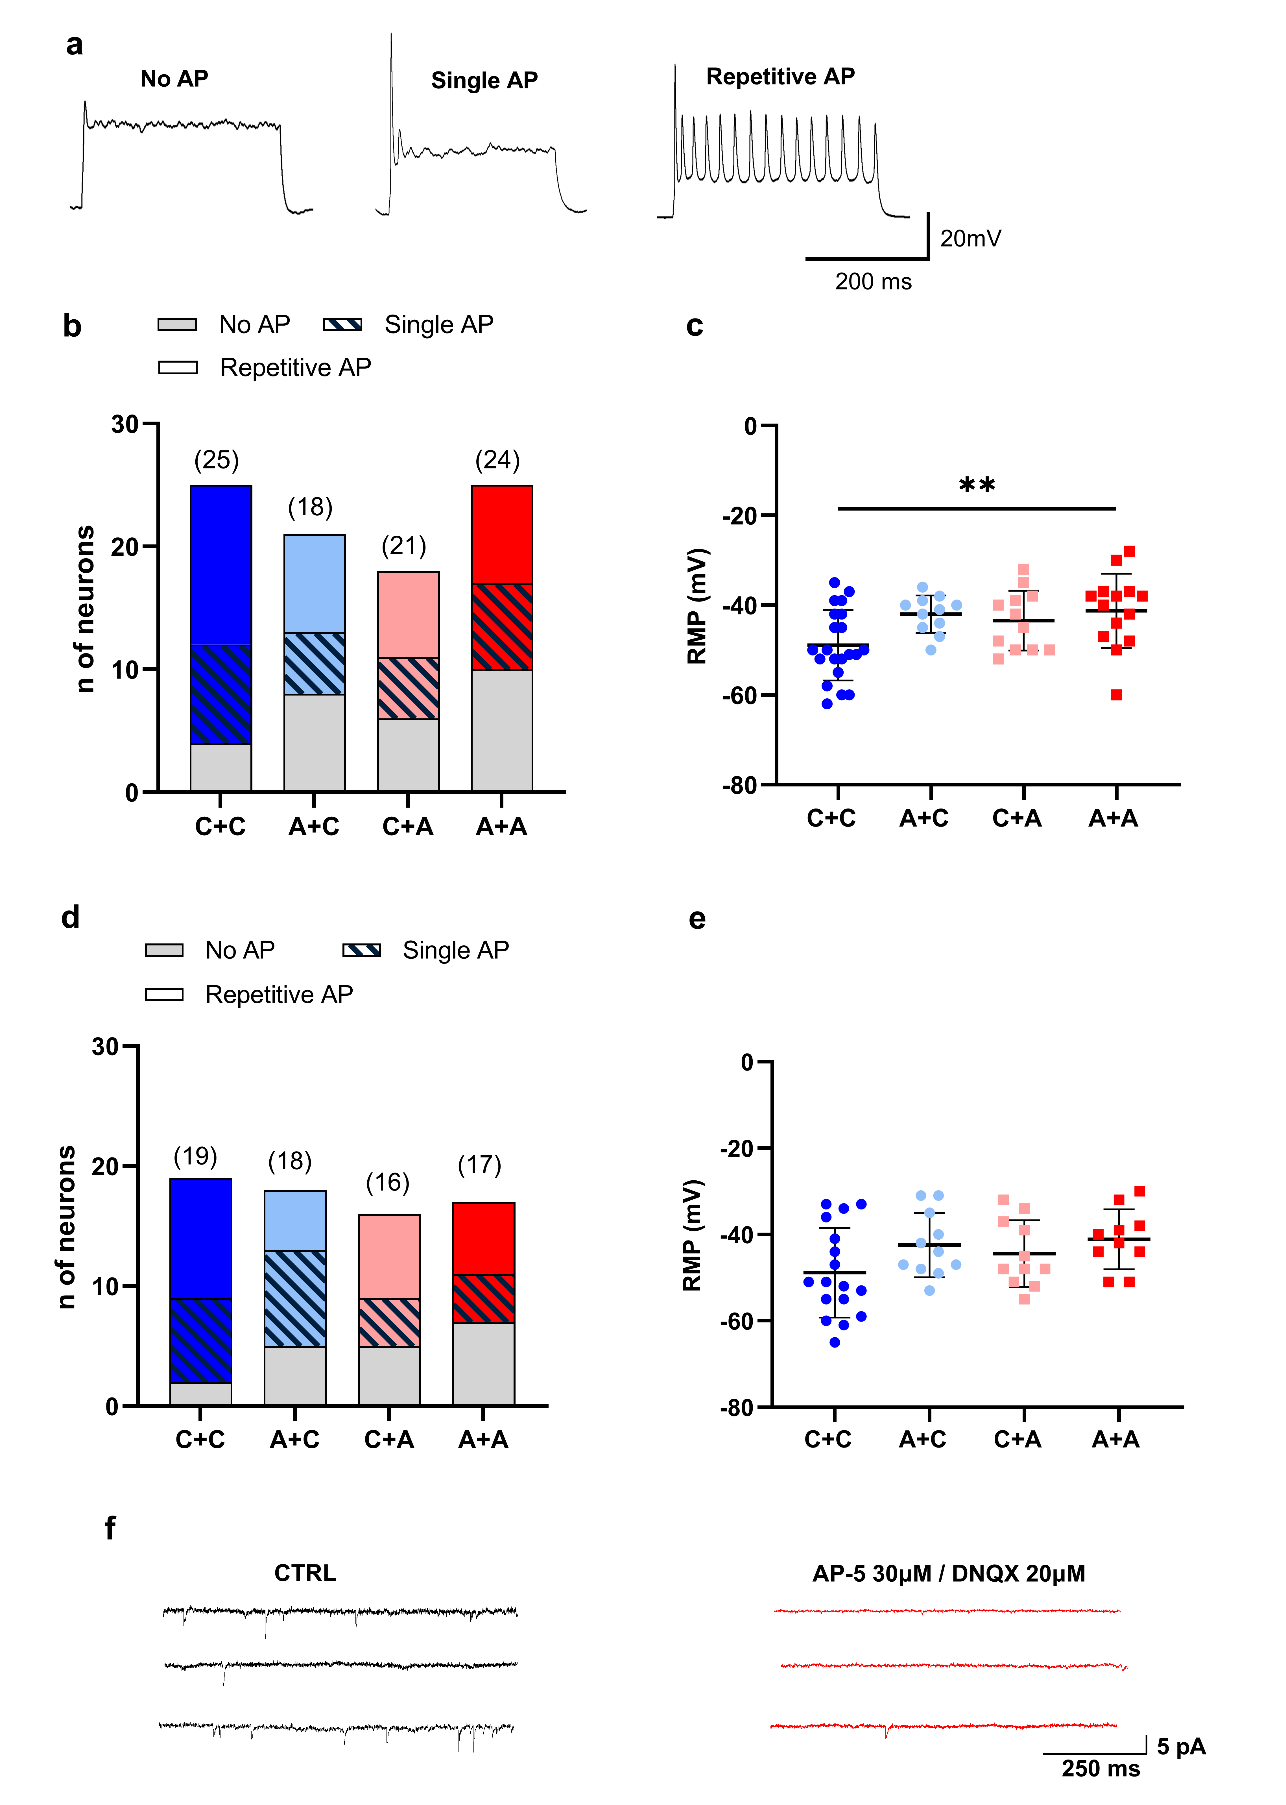


**Supplementary Fig1:**

**(a)** Representative 400-ms sample traces of neuronal responses to optimal depolarizing current injections. Neurons were classified according to their action-potential (AP) firing behavior into three categories: no AP, single AP, or repetitive AP firing**.** Distribution of neuronal firing categories in two co-culture conditions: **(b)** neuron–astrocyte and **(c)** neuron–astrocyte–microglia. The number of recorded cells is displayed above each bar. **(d)** Resting membrane potential of neurons in cross-culture with astrocytes. **(e)** Resting membrane potential of neurons in cross-culture with astrocytes and microglia. **(f)** Representative traces of spontaneous excitatory postsynaptic currents (sEPSCs) recorded before and after application of 20 μM DNQX and 30 μM AP-5. Kruskal–Wallis tests were used for group comparisons, followed by Dunn’s post hoc test. Data are shown as scatter-dot plots with mean ± SD. p < 0.01**.
